# Supplementary material
Source: publisher figshare collection journal article supplement (https://acs.figshare.com/ndownloader/files/36578392)
Supplement: Supplementary file 1 [file 36578392]

## Supporting Information

### **Performance Leap of Lithium Metal Batteries in LiPF<sub>6</sub> Carbonate Electrolyte by a Phosphorus Pentoxide Acid Scavenger**

*Jian Zhang,<sup>1,#</sup> Jiayan Shi,<sup>2,3,#</sup> Leo W. Gordon,<sup>4</sup> Nastaran Shojarazavi,<sup>2</sup> Xiaoyu Wen,<sup>2</sup> Yifan Zhao,<sup>1</sup> Jianjun Chen,<sup>2</sup> Chi-Cheung Su,<sup>3</sup> Robert J. Messinger,<sup>4,\*</sup> Juchen Guo<sup>1,2,\*</sup>*

<sup>1</sup>Materials Science and Engineering Program, University of California – Riverside, Riverside, CA 92521, USA

<sup>2</sup>Department of Chemical and Environmental Engineering, University of California – Riverside, Riverside, CA 92521, USA

<sup>3</sup>Chemical Sciences and Engineering Division, Argonne National Laboratory, Lemont, IL 60439, USA

<sup>4</sup>Department of Chemical Engineering, The City College of New York, CUNY, New York, NY 10031, United States

#### AUTHOR INFORMATION

##### **Corresponding Author**

\*E-mail: [rmessinger@ccny.cuny.edu](mailto:rmessinger@ccny.cuny.edu); [jguo@engr.ucr.edu](mailto:jguo@engr.ucr.edu)

#These authors contribute equally.

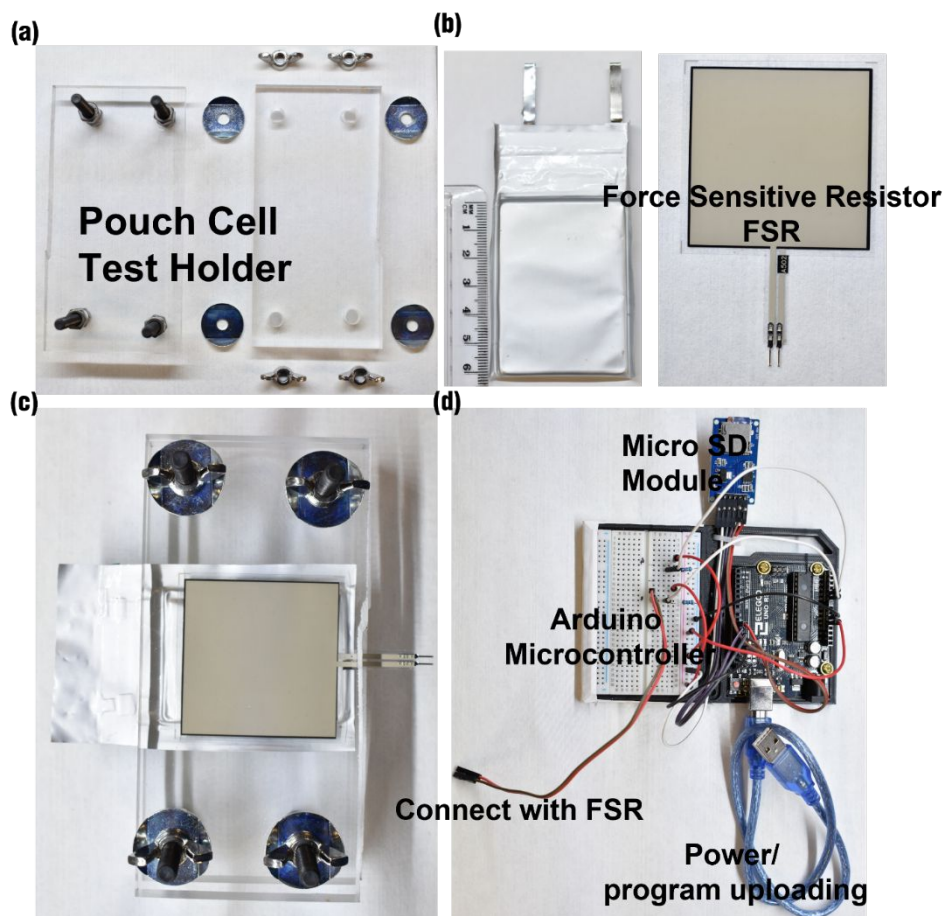

**Figure S1.** Photographs of (a) pouch cell testing holder, (b) force sensitive resistor, (c) assembled testing holder, and (d) pressure loading calibration by a (d) Arduino microcontroller.

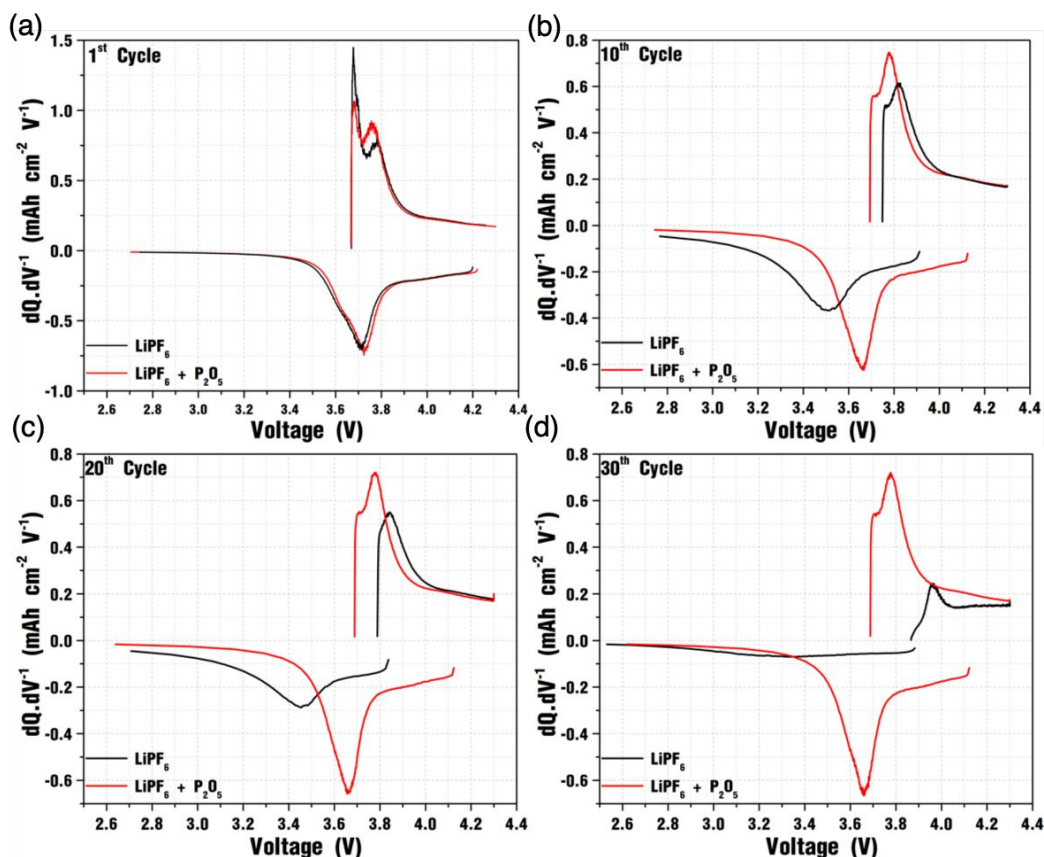

**Figure S2.** Differential capacity ( $dQ/dV$  vs. voltage) plots comparing the commercial (black) and  $\text{P}_2\text{O}_5$ -modified (red)  $\text{LiPF}_6$  electrolytes during the (a) 1<sup>st</sup> cycle, (b) 10<sup>th</sup> cycle, (c) 20<sup>th</sup> cycle, and (d) 30<sup>th</sup> cycle. The major redox peaks for the cell using the commercial electrolyte shift to higher voltages during charge (from 3.76 V in the 1<sup>st</sup> cycle to 3.96 V in the 30<sup>th</sup> cycle) and lower voltages during discharge (from 3.71 V in the 1<sup>st</sup> cycle to 3.27 V in the 30<sup>th</sup> cycle). However, the redox peaks for the cell using the  $\text{P}_2\text{O}_5$  -modified electrolyte do not shift upon galvanostatic cycling.

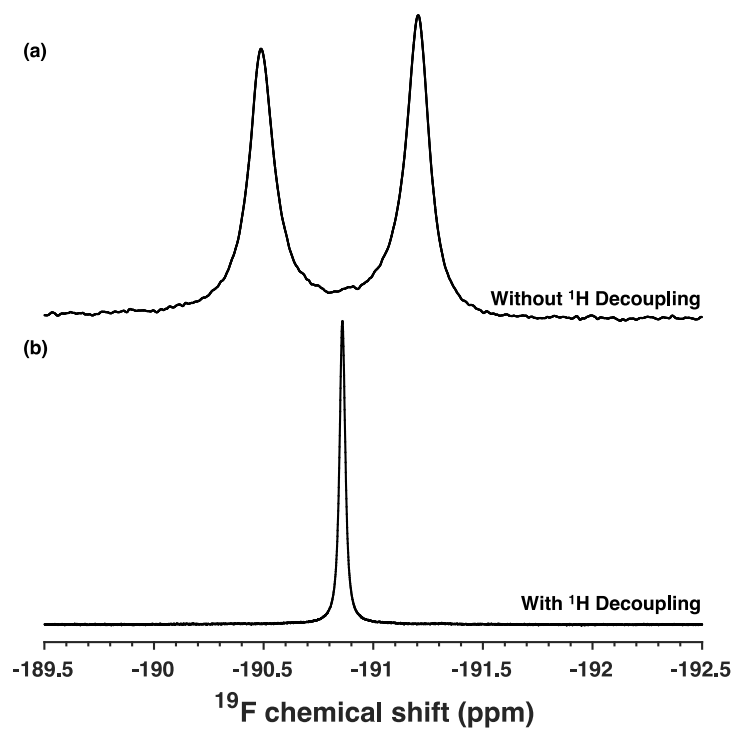

**Figure S3.** Liquid-state  $^{19}\text{F}$  single-pulse NMR measurements in the HF region (a) without and (b) with  $^1\text{H}$ - $^{19}\text{F}$  heteronuclear decoupling, both performed on the commercial 1 M  $\text{LiPF}_6$  electrolyte.

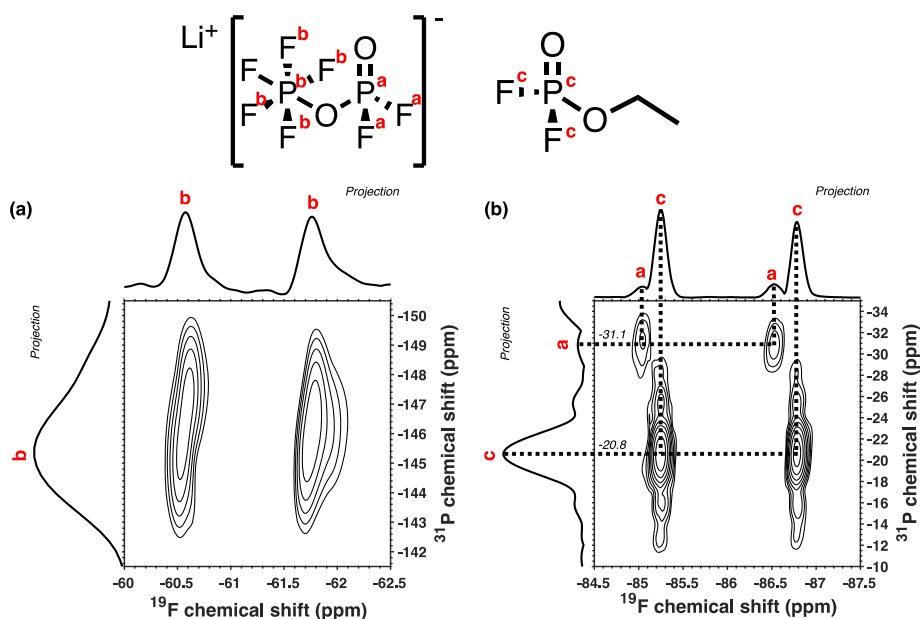

**Figure S4.** Liquid-state 2D  $^{19}\text{F}\{^{31}\text{P}\}$  HMQC through-bond correlation NMR measurements on the  $\text{P}_2\text{O}_5$ -modified  $\text{LiPF}_6$  electrolyte, which establishes interactions between (a) the  $^{19}\text{F}$  doublet at -61.1 ppm and  $^{31}\text{P}$  signal at approximately -146 ppm, as well as (b) the  $^{19}\text{F}$  doublet centered at -85.7 ppm and  $^{31}\text{P}$  signal at -31.1 ppm. These  $^{19}\text{F}$ - $^{31}\text{P}$  through-bond correlation experiments confirm the existence of the  $\text{OPF}_2\text{OPF}_5^-$  anions (species “D” in **Figure 2** and **Table 1**, main article). Additionally, the region in (b) shows the  $^{19}\text{F}$ - $^{31}\text{P}$  through-bond correlation between the  $^{19}\text{F}$  signal centered at -86.0 ppm and  $^{31}\text{P}$  signal at -20.8 ppm, associated with  $\text{C}_2\text{H}_5\text{OPOF}_2$  (species “E” in **Figure 2** and **Table 1**, main article). Chemical structures of these electrolyte species are labeled with  $^{19}\text{F}$  and  $^{31}\text{P}$  signal assignments.

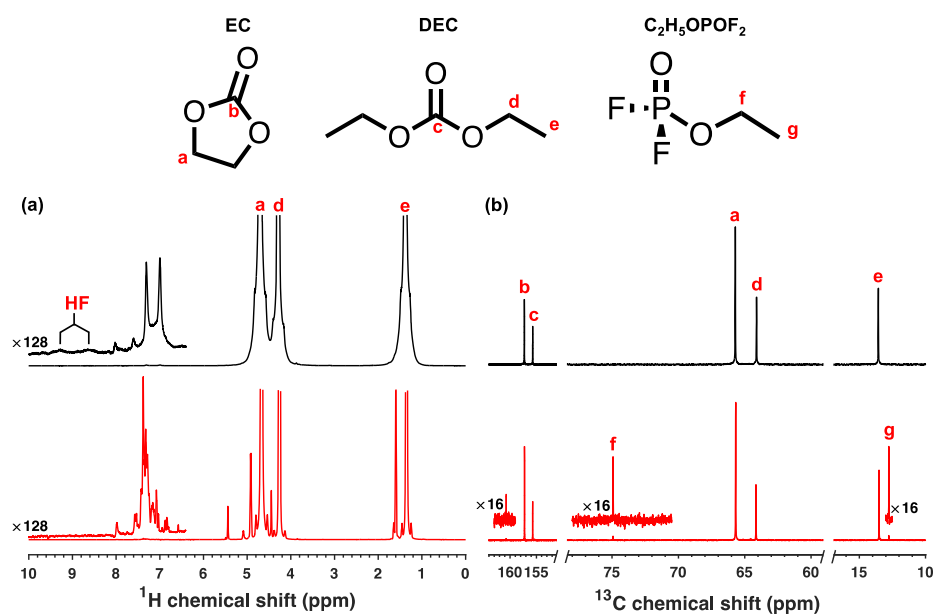

**Figure S5.** Liquid-state (a)  $^1\text{H}$ , and (b)  $^{13}\text{C}$  single-pulse NMR measurements of the commercial (black) and  $\text{P}_2\text{O}_5$ -modified (red) 1 M  $\text{LiPF}_6$  electrolyte in EC/DEC (50/50 v/v). Integration of the relative  $^{13}\text{C}$  signal intensities reveal that the molar ratio of DEC:EC is 0.57:1.0 and 0.37:1.0 in the commercial and  $\text{P}_2\text{O}_5$ -modified electrolyte, respectively, establishing that DEC is the major source for organic species in the reaction products generated from  $\text{P}_2\text{O}_5$ . Chemical structures of major proton- and carbon-containing electrolyte species are labeled with  $^1\text{H}$  and  $^{13}\text{C}$  signal assignments.

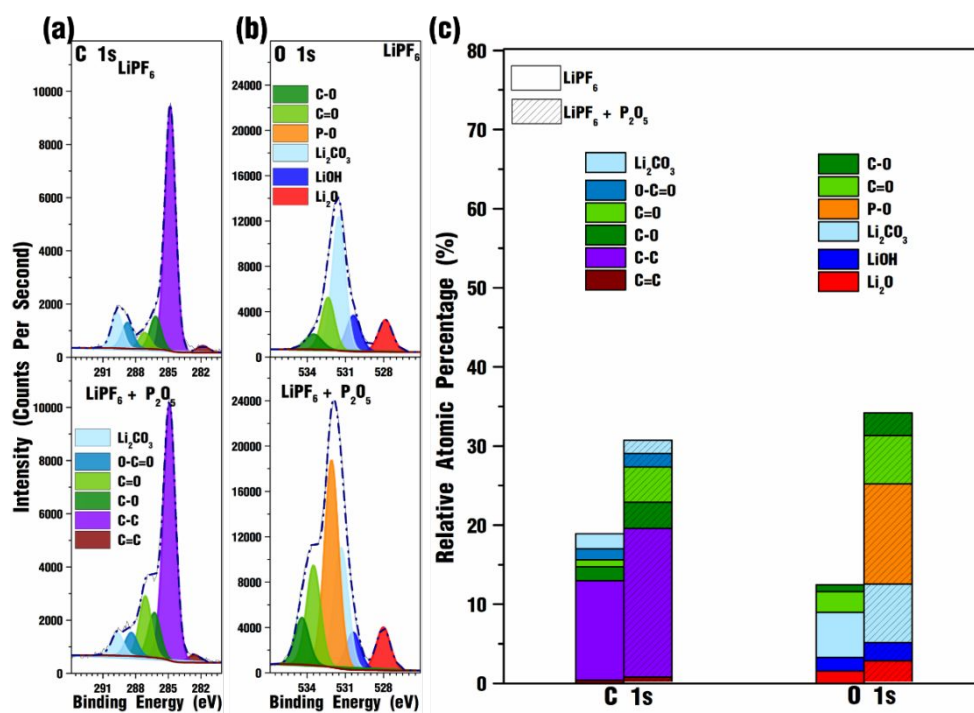

**Figure S6.** (a) C 1s and (b) O 1s XPS spectra of the Li metal surface after immersion in the commercial (top) or P<sub>2</sub>O<sub>5</sub>-modified (bottom) LiPF<sub>6</sub> electrolyte for 48 hours. (c) Relative atomic percentage of C and O atoms on the surfaces.

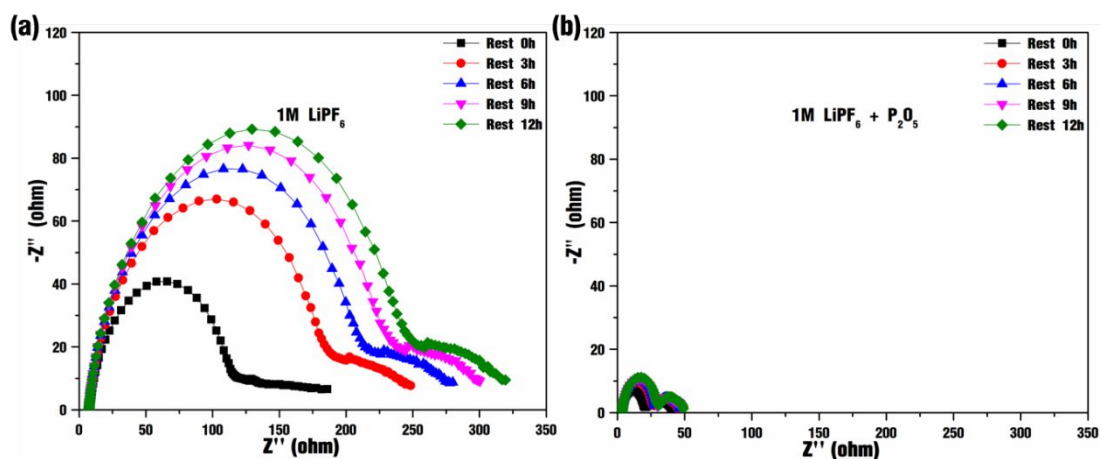

**Figure S7.** EIS Nyquist plots performed at different rest times in Li||Li symmetric cells in (a) commercial or (b)  $P_2O_5$ -modified  $LiPF_6$  electrolyte. The EIS data was analyzed by ZSim software to deconvolute the circuit elements using the equivalent circuit model displayed below.

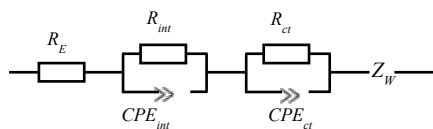



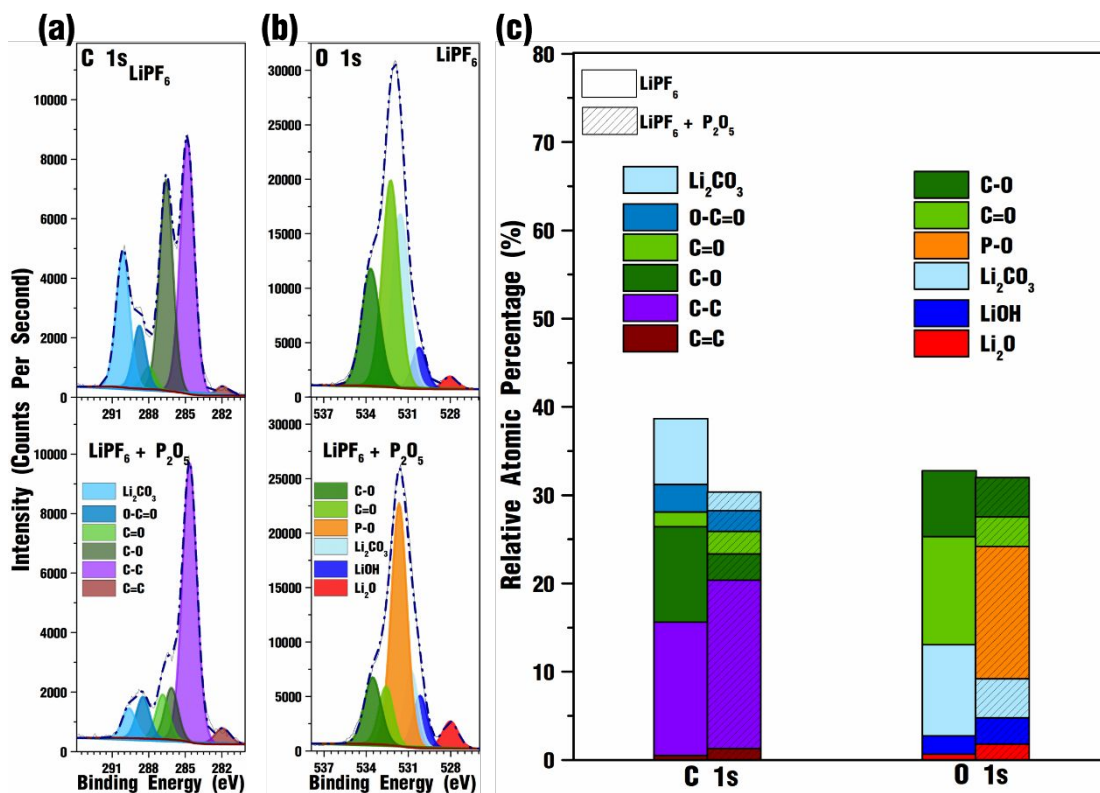

**Figure S8.** (a) C 1s, (b) O 1s, (c) Li 1s XPS spectra, of the Li metal surface after galvanostatic deposition ( $0.3 \text{ mA cm}^{-2}$ ) for 10 hours in commercial or  $\text{P}_2\text{O}_5$ -modified 1 M  $\text{LiPF}_6$  electrolyte. (c) Relative atomic percentage of C and O atoms on the surfaces.

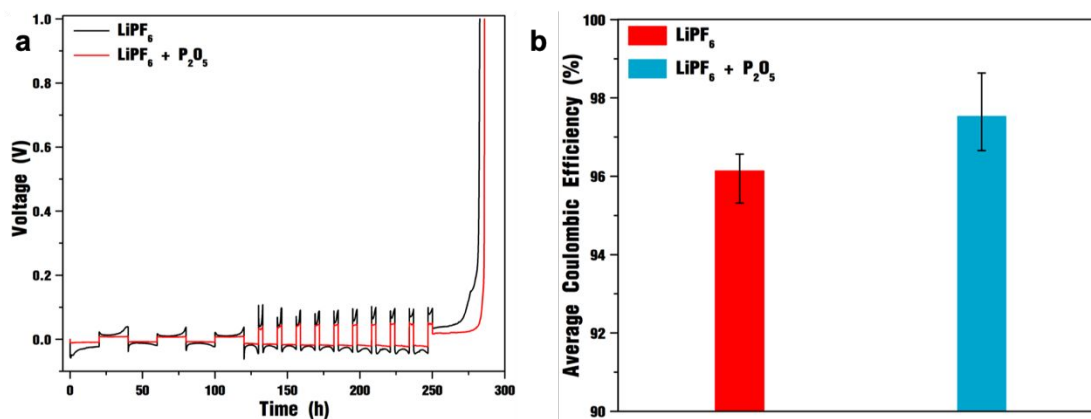

**Figure S9.** (a) The representative Li deposition and stripping curves to measure the CE and (b) The average CE of Li deposition-stripping measured from the pristine and  $\text{P}_2\text{O}_5$ -modified  $\text{LiPF}_6$  electrolyte.

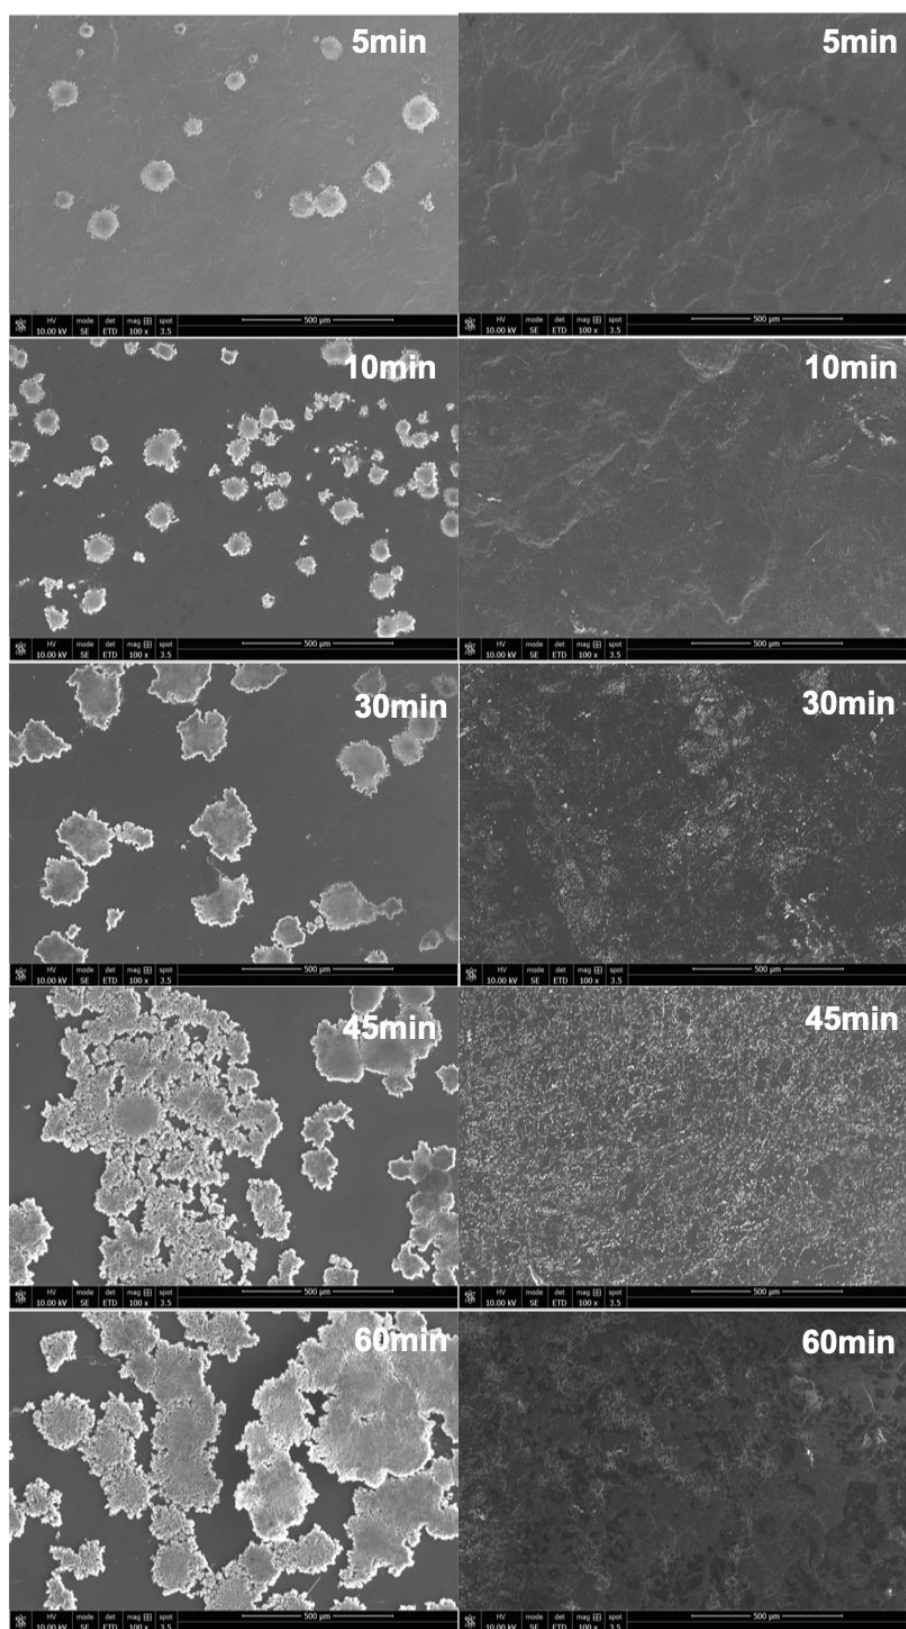

**Figure S10.** Left column: Li deposition from the pristine  $\text{LiPF}_6$  electrolyte; Right column: Li deposition from the  $\text{P}_2\text{O}_5$ -modified  $\text{LiPF}_6$  electrolyte.

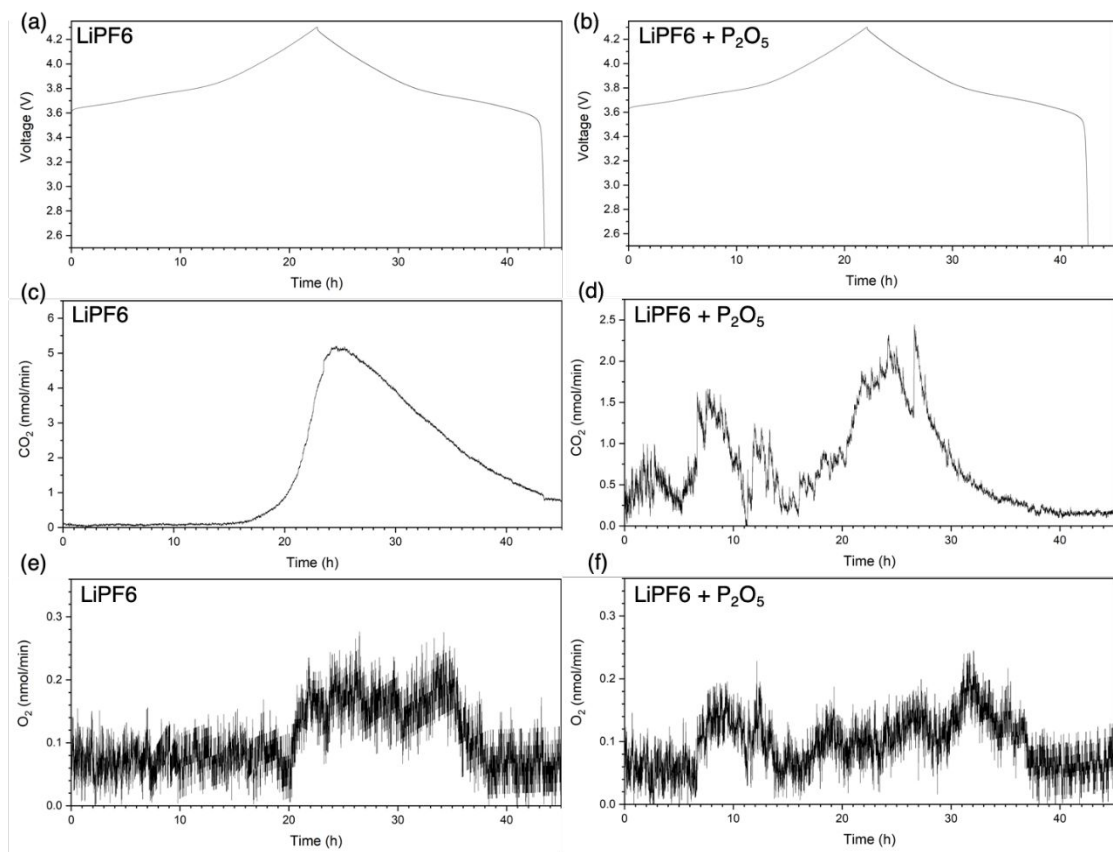

**Figure S11.** Gas analysis using DEMS. (a, b) Charge-discharge curves, (c, d)  $\text{CO}_2$  generation rate and (e, f)  $\text{O}_2$  generation rate with commercial  $\text{LiPF}_6$  electrolyte and the electrolyte modified by  $\text{P}_2\text{O}_5$ .
